# Supplementary material for: Tuning the singlet-triplet energy gap: a unique approach to efficient photosensitizers with aggregation-induced emission (AIE) characteristics
Source: PubMed Central journal article supplement (PMC5520955; doi:10.1039/c5sc01733e), 2015-07-17
Supplement: SC-006-C5SC01733E-s001.pdf [file SC-006-C5SC01733E-s001.pdf]

*Supporting Information*

# **Tuning the Singlet-Triplet Energy Gap: Unique Approach to Efficient Photosensitizers with Aggregation- Induced Emission (AIE) Characteristics**

*Shidang Xu,<sup>\*,†</sup> Youyong Yuan,<sup>\*,†</sup> Xiaolei Cai,<sup>†</sup> Chong-Jing Zhang,<sup>†</sup> Jing Liang,<sup>†</sup> Fang Hu,<sup>§</sup>*

*Guanxin Zhang,<sup>§</sup> Deqing Zhang,<sup>§</sup> and Bin Liu<sup>\*,†,#</sup>*

<sup>†</sup>Department of Chemical and Biomolecular Engineering, 4 Engineering Drive 4, National University of Singapore, Singapore, 117585

<sup>#</sup>Institute of Materials Research and Engineering, 3 Research Link, Singapore, 117602

<sup>§</sup>Beijing National Laboratory for Molecular Sciences, Organic Solids Laboratory, Institute of Chemistry, Chinese Academy of Sciences, Beijing 100190, China

**Synthesis of DMTPBr.** To the solution of 4-bromobenzophenone (5.3 g, 20.3 mmol) and 4,4'-dimethoxybenzophenone (3.8 g, 15.7 mmol) in dry THF (80 ml) was added zinc powder (5.9 g, 90.8 mmol). Then the suspension was cooled down to  $-78\text{ }^{\circ}\text{C}$ . Titanium tetrachloride (5.0 ml) was added to the above mixture dropwise. After addition, the mixture was slowly warmed up to room temperature, followed by reflux for 8 hours. Then the mixture was cooled down in ice-water bath and saturated sodium bicarbonate aqueous solution (50 mL) was added slowly. The mixture was extracted with ethyl acetate (100 ml  $\times$  3). The combined organic phase was washed with brine (100 ml  $\times$  2), and dried over  $\text{MgSO}_4$ . Then the mixture was filtered and the filtrate was concentrated under reduced pressure. The desired residue was purified with chromatography (hexane/ethyl acetate = 100/1 to 30/1) to give the desired product (3.1 g, 41.8%).  $^1\text{H}$  NMR (400 MHz,  $\text{CDCl}_3$ )  $\delta$  7.22 (d,  $J = 8.0$  Hz, 2H), 7.10 (m, 3H), 7.00 (m, 2H), 6.87-6.94 (m, 6H), 6.67 (d,  $J = 8.8$  Hz, 2H), 6.63 (d,  $J = 8.8$  Hz, 2H), 3.76 (s, 3H), 3.73 (s, 3H);  $^{13}\text{C}$  NMR (100 MHz,  $\text{CDCl}_3$ )  $\delta$  158.2, 158.0, 143.8, 143.1, 140.9, 137.8, 136.1, 135.9, 133.0, 132.5, 131.3, 130.8, 127.7, 126.2, 113.2, 113.0, 55.0.

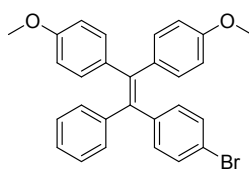

DMTPBr

**Synthesis of PPAC.** 4-acetylphenylboronic acid (1.04g, 6.36 mmol) and **DMTPBr** (2.00g, 4.24 mmol) were dissolved in THF (20.0 mL), and then 2 M aqueous  $\text{K}_2\text{CO}_3$  solution (4.0 mL) and Aliquat 336 were added. The mixture was stirred for 40 min under an argon atmosphere at room temperature. Then the  $\text{Pd}(\text{PPh}_3)_4$  catalyst was added and the reaction mixture was stirred at  $75\text{ }^{\circ}\text{C}$  for 16 h. After cooling to room temperature, the mixture was extracted with ethyl acetate (50mL $\times$ 3). The combined organic phase was concentrated and purified by silica gel column chromatography

(hexane/ethyl acetate = 40/1-5/1). The product was dried under vacuum to afford compound **PPAc** as a yellow solid (1.80 g, 83% yield).  $^1\text{H}$  NMR (400 MHz,  $\text{CDCl}_3$ )  $\delta$  7.92 (d,  $J = 8.3$  Hz, 2H), 7.58 (d,  $J = 8.4$  Hz, 2H), 7.32 (d,  $J = 8.3$  Hz, 2H), 7.09 – 6.96 (m, 6H), 6.89 (dd,  $J = 15.0, 8.7$  Hz, 4H), 6.58 (t,  $J = 8.6$  Hz, 4H), 3.67 (s, 6H), 2.55 (s, 4H).  $^{13}\text{C}$  NMR (100 MHz,  $\text{CDCl}_3$ )  $\delta$  197.6, 158.2, 158.1, 145.2, 144.5, 144.1, 140.7, 138.4, 137.0, 136.1, 135.6, 132.5, 131.9, 131.4, 128.9, 128.8, 127.7, 127.4, 126.8, 126.3, 126.2, 113.1, 113.0, 77.3, 77.0, 76.7, 55.0, 55.0, 26.6, 26.5. EI-MS,  $m/z$ :  $[\text{M}+1]^+$  calcd 510.2, found 510.5.

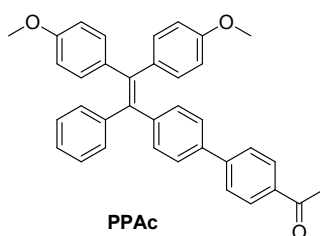

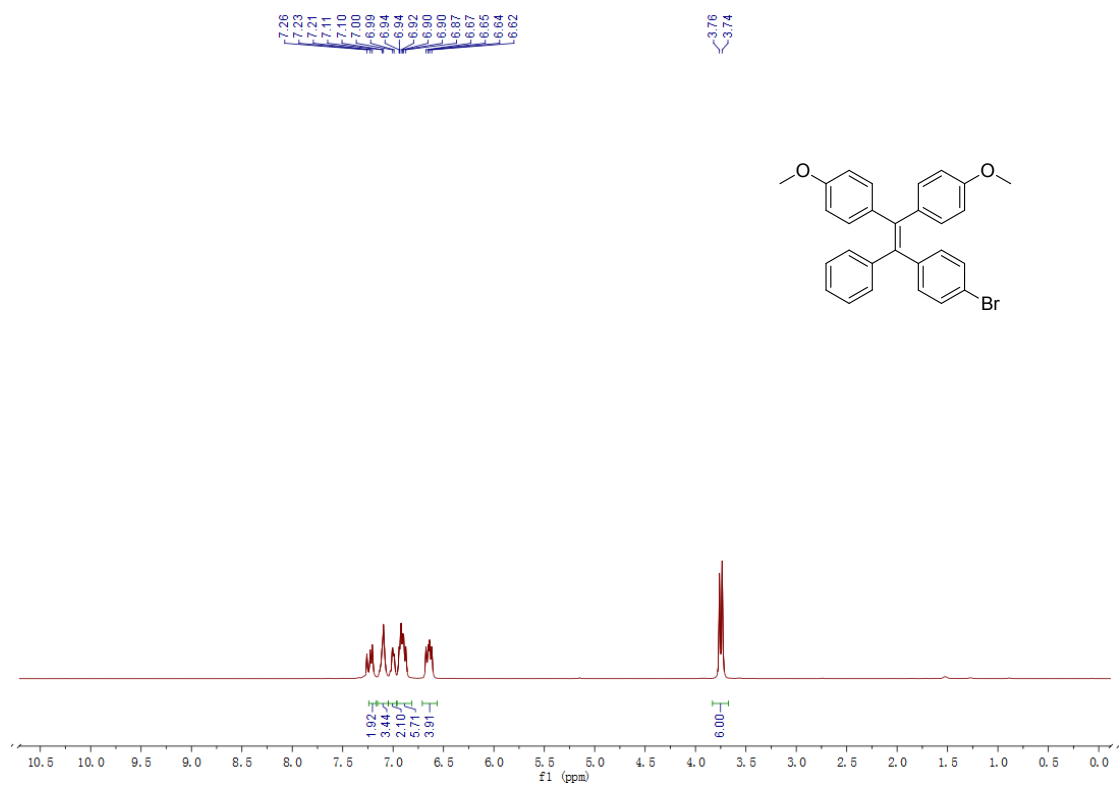

**Figure S1.** <sup>1</sup>H NMR spectrum of compound **DMTPBr** in CDCl<sub>3</sub>.

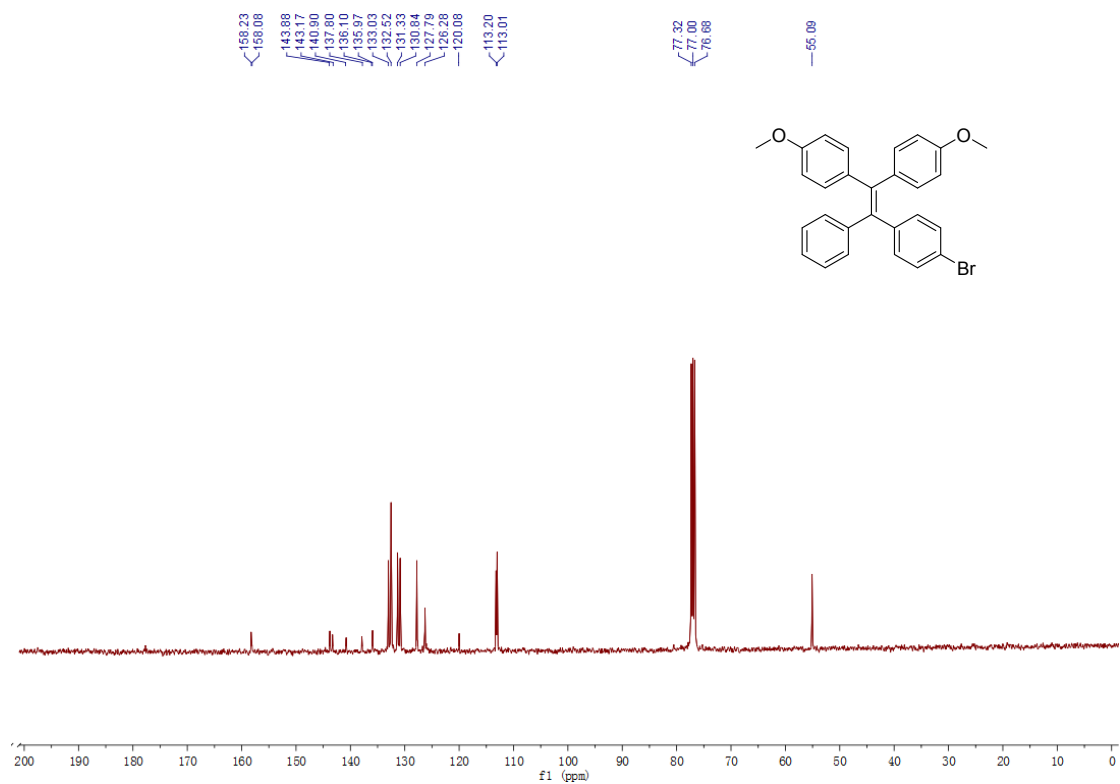

**Figure S2.** <sup>13</sup>C NMR spectrum of compound **DMTPBr** in CDCl<sub>3</sub>.

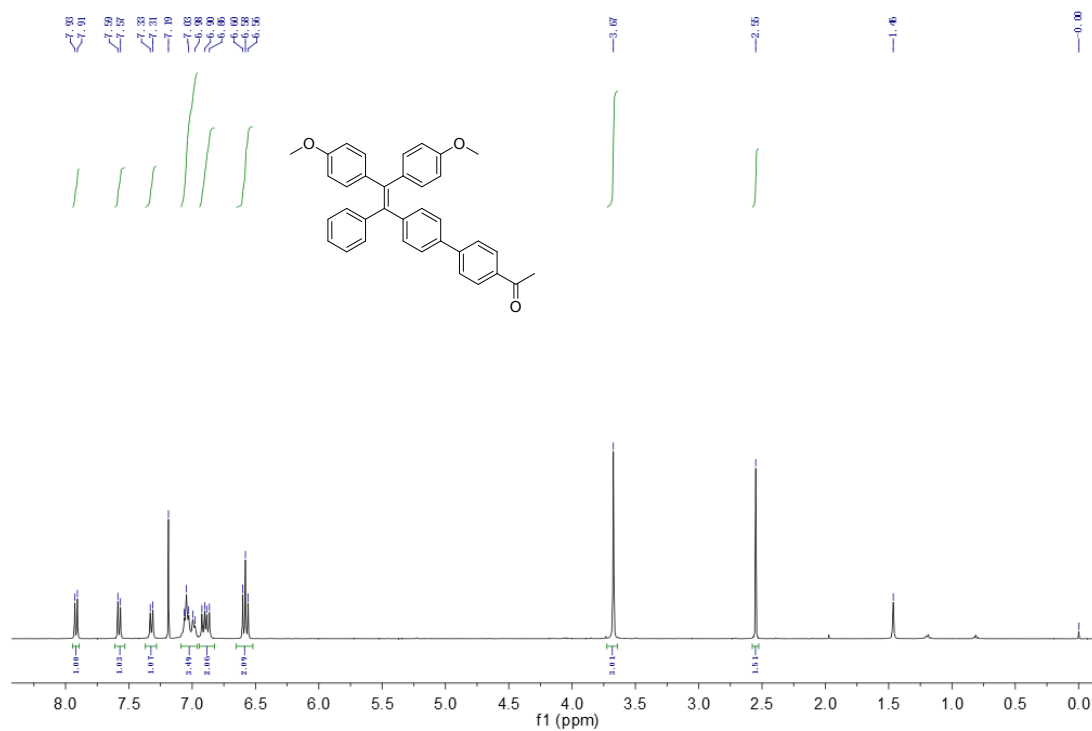

**Figure S3.**  $^1\text{H}$  NMR spectrum of compound PPAc in  $\text{CDCl}_3$ .

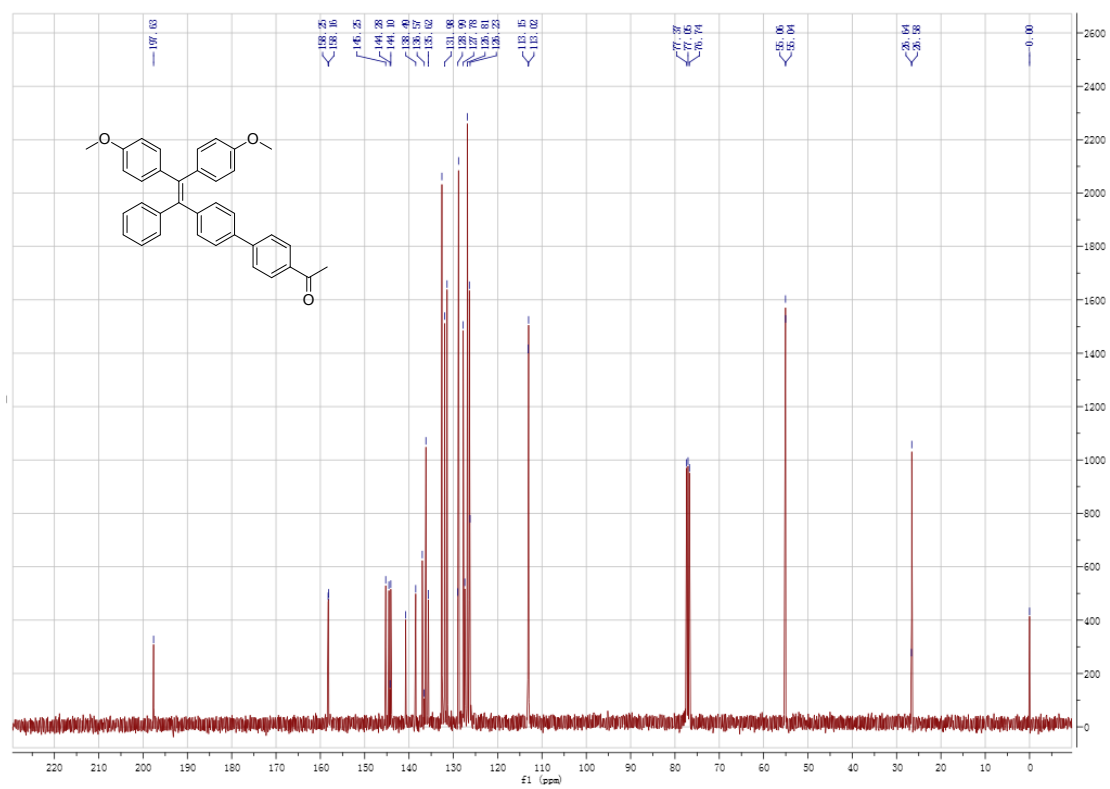

**Figure S4.**  $^{13}\text{C}$  NMR spectrum of compound PPAc in  $\text{CDCl}_3$ .

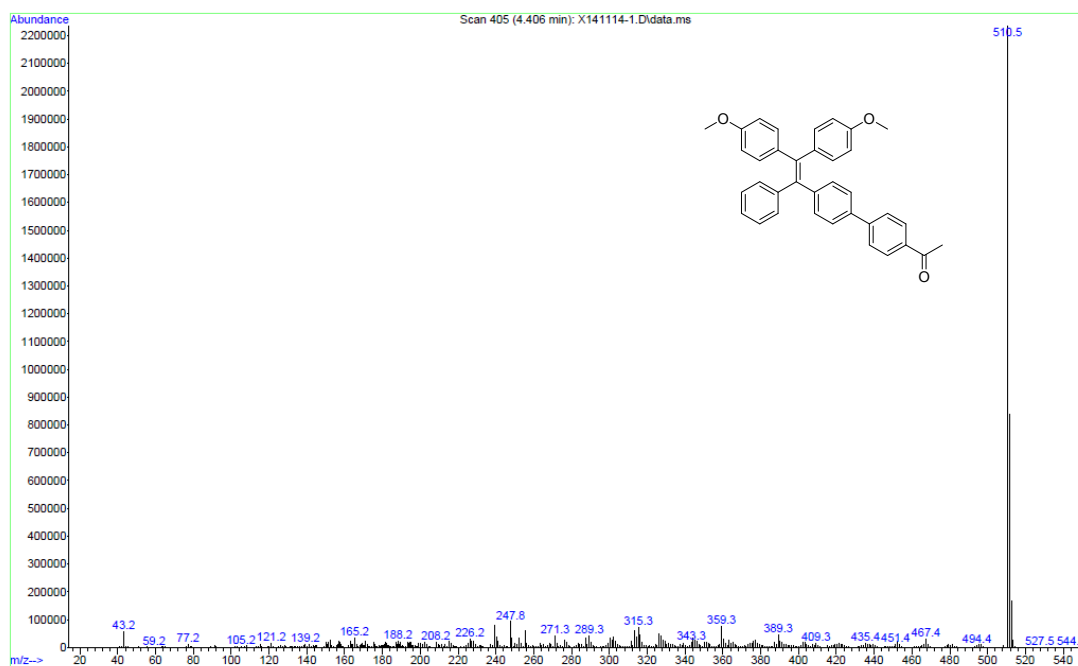

Figure S5. MS spectrum of compound PPAc in CDCl<sub>3</sub>.

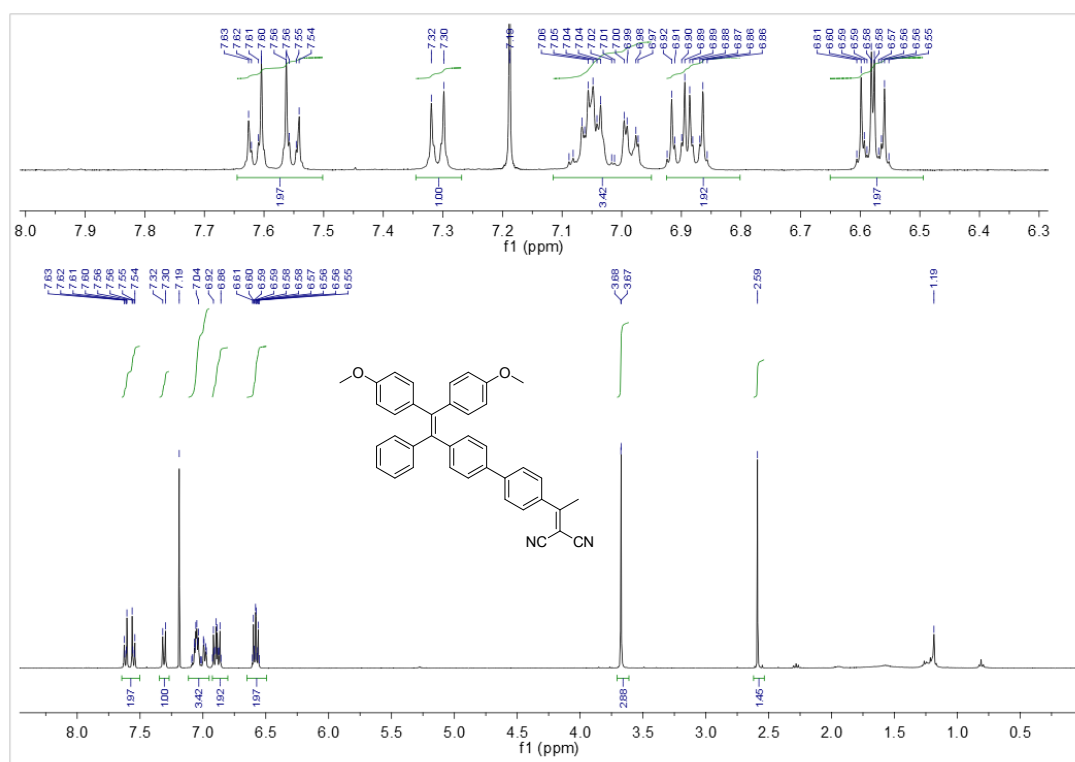

Figure S6 <sup>1</sup>H NMR spectrum of compound PPDC in CDCl<sub>3</sub>.

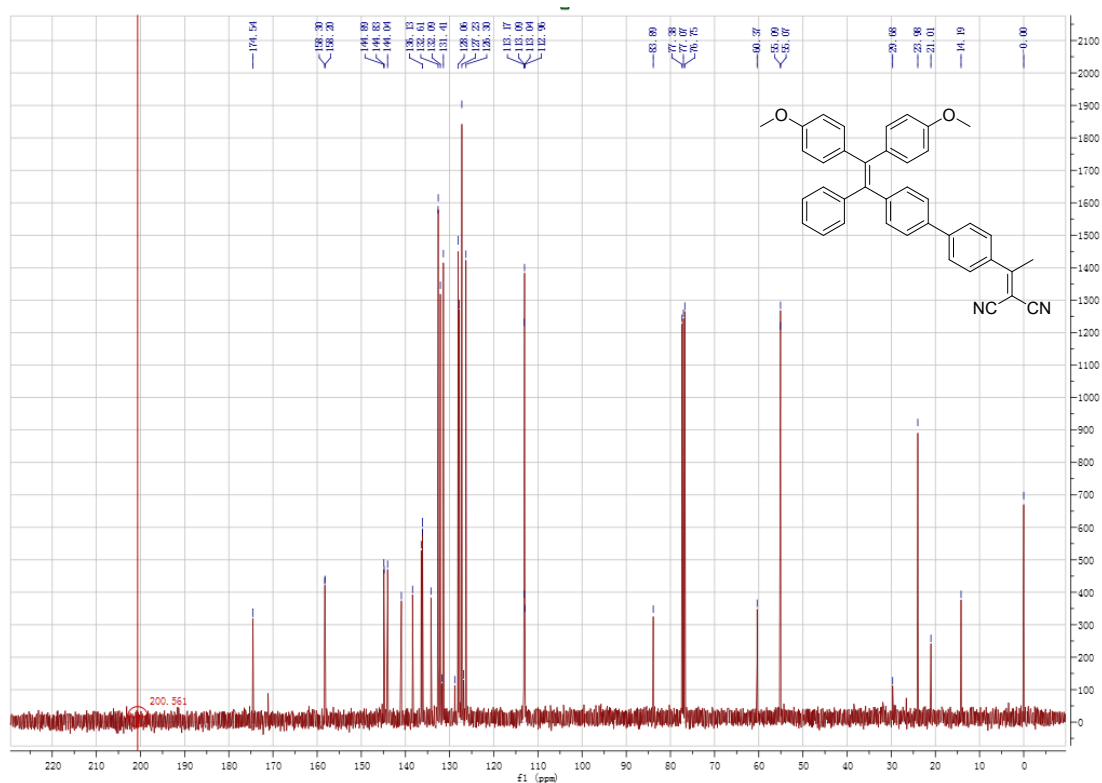

**Figure S7.** <sup>13</sup>C NMR spectrum of compound **PPDC** in CDCl<sub>3</sub>.

File : C:\MSDCHEM\1\DATA\OUTSIDE\CHBE\20141117\Snapshot\X141114-2.D  
 Operator : SY  
 Acquired : 17 Nov 2014 11:44 using AcqMethod 40\_300.M  
 Instrument : Instrument #1  
 Sample Name : X141114-2  
 Misc Info : ChBE A/P Liu Bin  
 Vial Number : 1

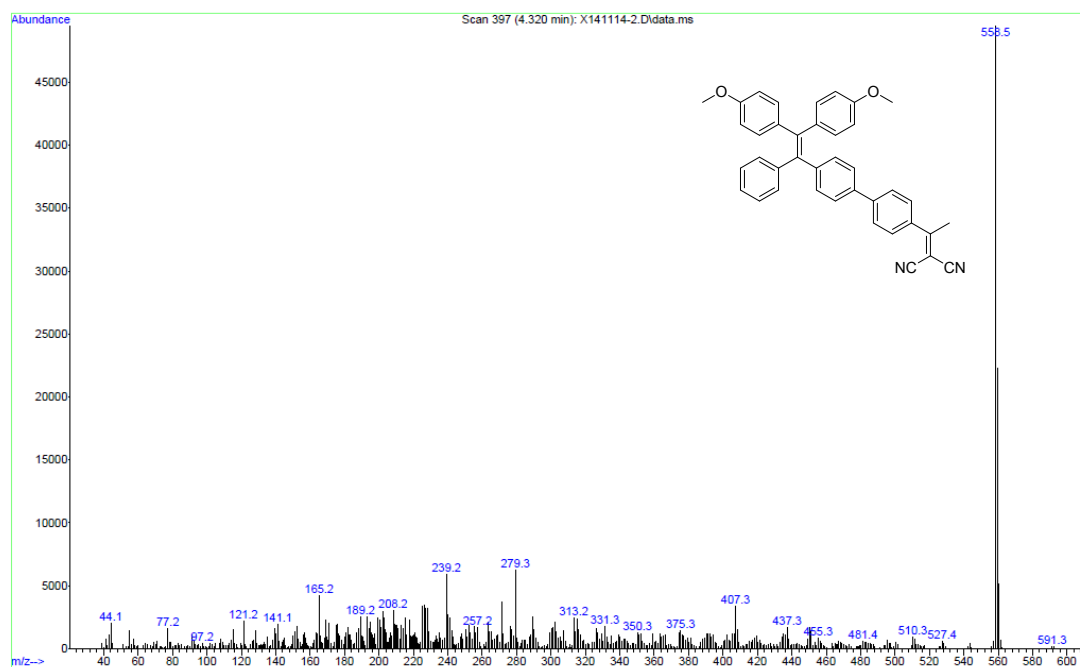

**Figure S8.** MS spectrum of compound **PPDC** in CDCl<sub>3</sub>.

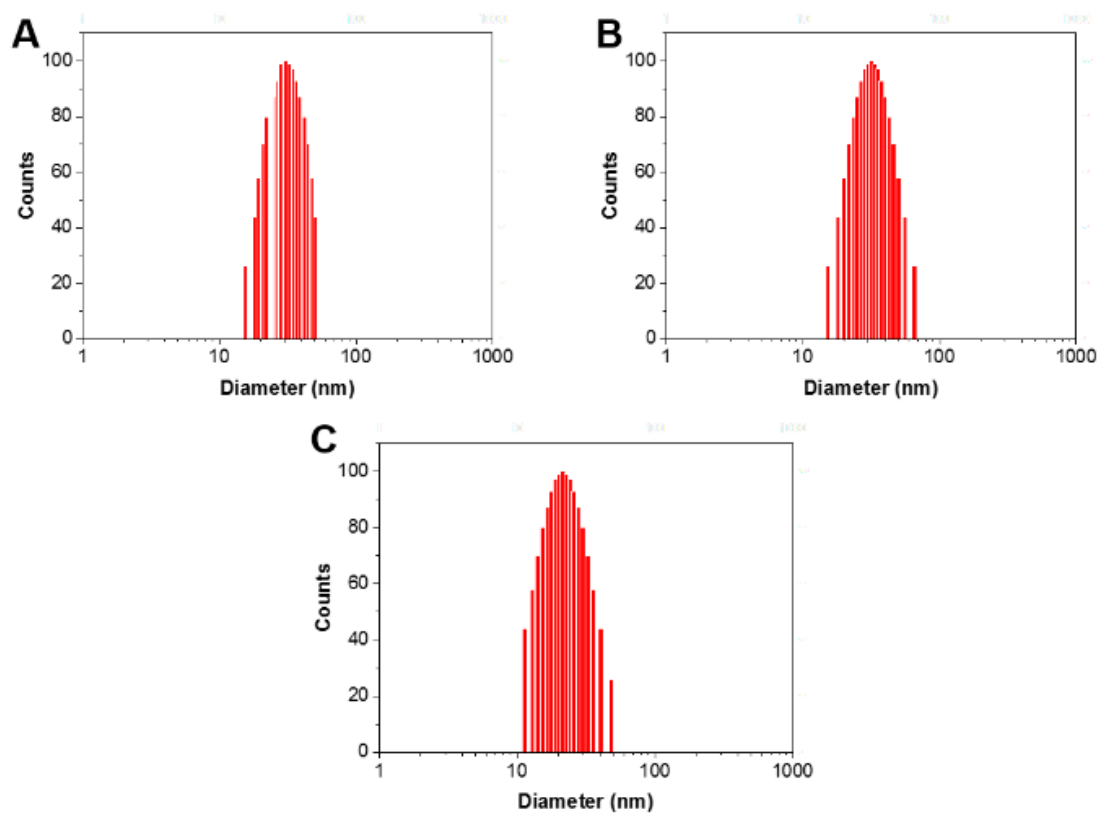

**Figure S9.** Size distributions of aggregates of 10  $\mu\text{M}$  TPDC (A), PPDC (B) and TPPDC (C) in DMSO/water ( $v/v = 1/99$ ).



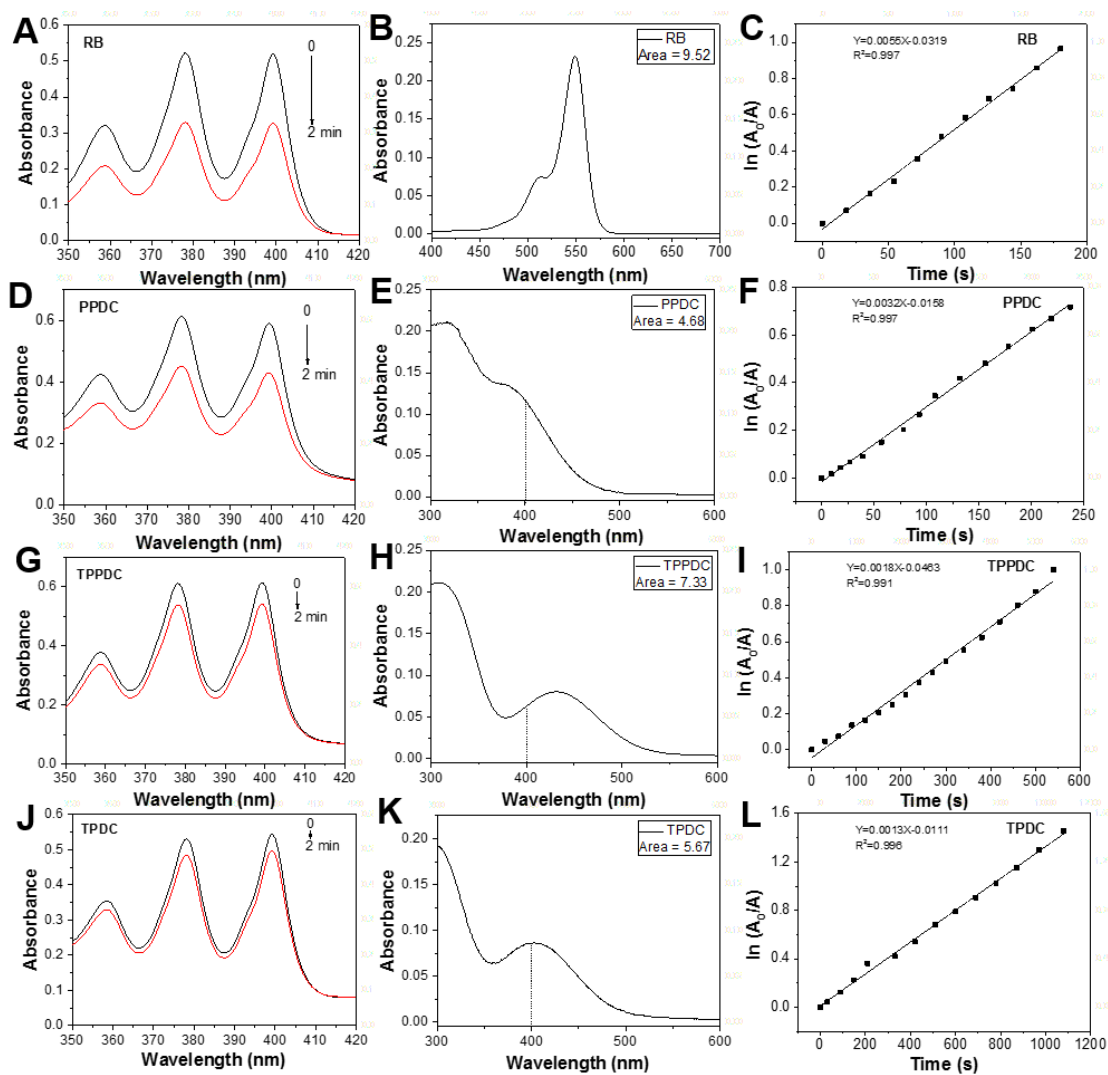

**Figure S10.** Chemical trapping measurements of the  $^1\text{O}_2$  quantum yield. Photodegradation of ABDA with RB (A), PPDC (D), TPPDC (G) and TPDC (J); The absorption peak area of RB (B), PPDC (E), TPPDC (H) and TPDC (K); The decomposition rate constants of ABDA by RB (C), PPDC (F), TPPDC (I) and TPDC (L). To eliminate the inner-filter effect, the absorption maxima were adjusted to  $\sim 0.2$  OD.

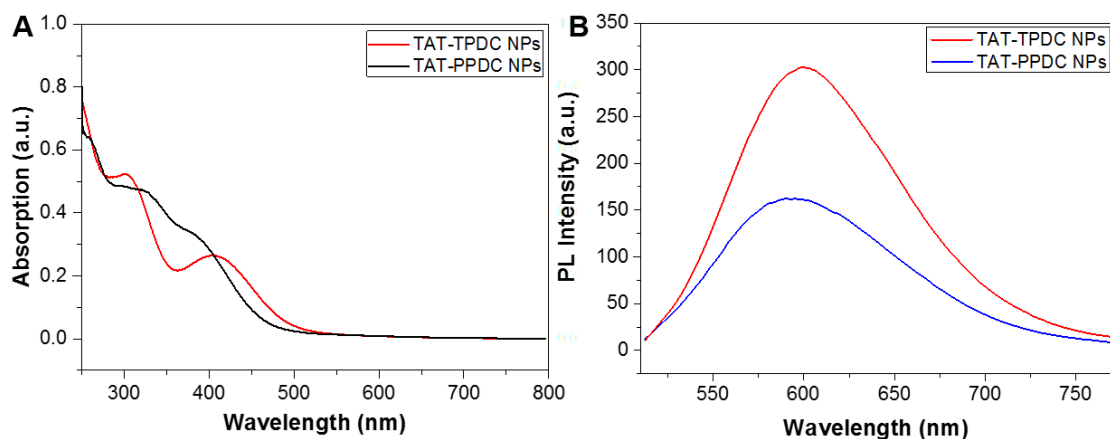

**Figure S11.** (A) UV-vis absorption and (B) PL spectra of **TAT-TPDC NPs** and **TAT-PPDC NPs**.  $E_x = 405$  nm. Concentration:  $10 \mu\text{g/mL}$ .

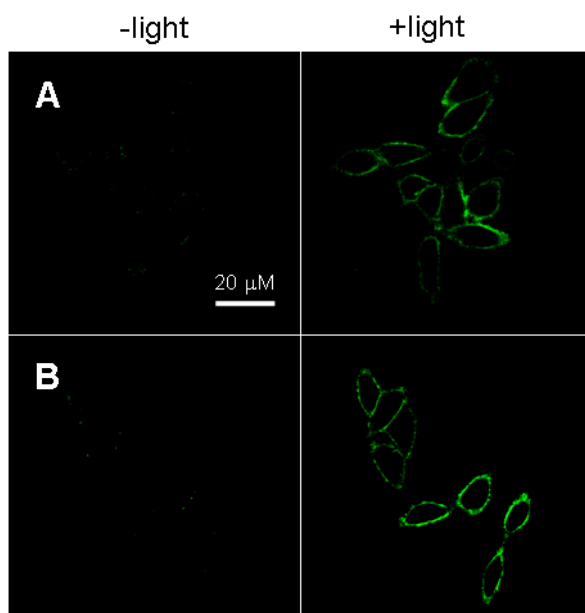

**Figure S12.** Cell apoptosis imaging using FITC-tagged Annexin V in HeLa cells incubated with **TAT-TPDC NPs** (A) and **TAT-PPDC NPs** (B) with or without light irradiation ( $0.25 \text{ W cm}^{-2}$ ). The green fluorescence is from FITC ( $E_x$ : 488 nm;  $E_m$ : 505–525 nm). All images share the same scale bar of  $20 \mu\text{m}$ .

Geometry Data for **TPE** ( $S_0$  optimization: unit Å)

|   |             |             |             |
|---|-------------|-------------|-------------|
| C | -3.57082400 | -3.06991100 | 0.40528900  |
| C | -3.32920800 | -2.01530200 | 1.28740300  |
| C | -2.18296400 | -1.23403800 | 1.15159800  |
| C | -1.25157300 | -1.49067700 | 0.13133500  |
| C | -1.49745700 | -2.57019100 | -0.73526700 |
| C | -2.64951600 | -3.34387800 | -0.60742300 |
| C | -0.00000500 | -0.68306800 | -0.00000200 |
| C | -0.00000300 | 0.68306600  | 0.00000000  |
| C | 1.25156600  | -1.49067500 | -0.13133700 |
| C | 1.25156900  | 1.49067000  | 0.13133600  |
| C | -1.25157000 | 1.49067900  | -0.13133600 |
| C | 2.18295100  | -1.23404200 | -1.15160700 |
| C | 3.32919700  | -2.01530300 | -1.28741100 |
| C | 3.57082200  | -3.06990300 | -0.40528900 |
| C | 2.64952000  | -3.34386400 | 0.60743100  |
| C | 1.49745800  | -2.57018000 | 0.73527400  |
| C | -2.18296800 | 1.23403700  | -1.15159100 |
| C | -3.32920900 | 2.01530600  | -1.28739500 |
| C | -3.57081500 | 3.06992300  | -0.40528800 |
| C | -2.64949900 | 3.34389300  | 0.60741600  |
| C | -1.49744300 | 2.57020200  | 0.73525900  |
| C | 1.49747000  | 2.57016700  | -0.73528200 |
| C | 2.64953300  | 3.34384800  | -0.60743900 |
| C | 3.57082700  | 3.06989300  | 0.40529000  |
| C | 3.32919300  | 2.01530200  | 1.28742000  |
| C | 2.18294500  | 1.23404300  | 1.15161500  |
| H | -4.46508200 | -3.67730300 | 0.51046900  |
| H | -4.03294400 | -1.80153600 | 2.08685500  |
| H | -2.00104700 | -0.41597800 | 1.84060900  |
| H | -0.77849500 | -2.79718800 | -1.51665500 |
| H | -2.82541200 | -4.16506900 | -1.29654900 |
| H | 2.00102700  | -0.41598900 | -1.84062500 |
| H | 4.03292800  | -1.80154200 | -2.08686900 |
| H | 4.46508100  | -3.67729300 | -0.51046800 |
| H | 2.82542300  | -4.16504800 | 1.29656400  |
| H | 0.77850100  | -2.79717200 | 1.51666800  |
| H | -2.00106000 | 0.41597100  | -1.84059800 |
| H | -4.03295000 | 1.80153800  | -2.08684200 |
| H | -4.46507000 | 3.67731900  | -0.51046700 |
| H | -2.82538700 | 4.16509000  | 1.29653800  |
| H | -0.77847400 | 2.79720100  | 1.51664100  |
| H | 0.77851800  | 2.79715400  | -1.51668300 |
| H | 2.82544300  | 4.16502500  | -1.29657800 |
| H | 4.46508700  | 3.67728200  | 0.51046900  |
| H | 4.03291700  | 1.80154700  | 2.08688500  |
| H | 2.00101400  | 0.41599600  | 1.84063800  |

Geometry Data for **TPS** ( $S_0$  optimization: unit Å)

|    |             |             |             |
|----|-------------|-------------|-------------|
| C  | -0.75595200 | 0.27721900  | 0.02428300  |
| C  | 0.75595000  | 0.27721800  | -0.02428500 |
| C  | 1.35772800  | -0.94876200 | -0.07842900 |
| Si | -0.00000200 | -2.25599300 | 0.00000600  |
| C  | -1.35773100 | -0.94876000 | 0.07842700  |

|   |             |             |             |
|---|-------------|-------------|-------------|
| C | -1.50823400 | 1.56619100  | 0.01604000  |
| C | 1.50823600  | 1.56618800  | -0.01604100 |
| C | 2.80664500  | -1.23634500 | -0.01472400 |
| C | -2.80664800 | -1.23634200 | 0.01471800  |
| C | 1.35579400  | 2.49640300  | 1.02523900  |
| C | 2.08824300  | 3.68264900  | 1.03475500  |
| C | 2.97650800  | 3.96940900  | -0.00332900 |
| C | 3.13014300  | 3.05809700  | -1.04922100 |
| C | 2.40580800  | 1.86689300  | -1.05304600 |
| C | -2.40580700 | 1.86689600  | 1.05304500  |
| C | -3.13013800 | 3.05810200  | 1.04922200  |
| C | -2.97650000 | 3.96941600  | 0.00333100  |
| C | -2.08823500 | 3.68265500  | -1.03475300 |
| C | -1.35578800 | 2.49640700  | -1.02523800 |
| C | -3.36335800 | -2.22188400 | 0.85258500  |
| C | -4.71761700 | -2.54701000 | 0.78779000  |
| C | -5.54911700 | -1.90763300 | -0.13227200 |
| C | -5.01162200 | -0.93947700 | -0.98351400 |
| C | -3.66106400 | -0.60651300 | -0.91136900 |
| C | 3.66106100  | -0.60652700 | 0.91137000  |
| C | 5.01161900  | -0.93949200 | 0.98351200  |
| C | 5.54911400  | -1.90763700 | 0.13225700  |
| C | 4.71761400  | -2.54700200 | -0.78781300 |
| C | 3.36335500  | -2.22187600 | -0.85260400 |
| C | -0.19333900 | -3.34329900 | -1.53588300 |
| C | 0.19333600  | -3.34326500 | 1.53592000  |
| H | 0.66046300  | 2.28683900  | 1.83196000  |
| H | 1.96097400  | 4.38590200  | 1.85283700  |
| H | 3.54215400  | 4.89662500  | 0.00189900  |
| H | 3.81651500  | 3.27293100  | -1.86334600 |
| H | 2.53337000  | 1.15625900  | -1.86359600 |
| H | -2.53337100 | 1.15626100  | 1.86359400  |
| H | -3.81651000 | 3.27293700  | 1.86334700  |
| H | -3.54214200 | 4.89663300  | -0.00189500 |
| H | -1.96096300 | 4.38591000  | -1.85283300 |
| H | -0.66045800 | 2.28684300  | -1.83195900 |
| H | -2.72660400 | -2.72218300 | 1.57660600  |
| H | -5.12193400 | -3.30306300 | 1.45514200  |
| H | -6.60299700 | -2.16382100 | -0.18959600 |
| H | -5.64729800 | -0.44207400 | -1.71081200 |
| H | -3.25510500 | 0.14278900  | -1.58204700 |
| H | 3.25510100  | 0.14276800  | 1.58205700  |
| H | 5.64729500  | -0.44209800 | 1.71081600  |
| H | 6.60299400  | -2.16382600 | 0.18957700  |
| H | 5.12193100  | -3.30304700 | -1.45517500 |
| H | 2.72660000  | -2.72216500 | -1.57663100 |
| H | -0.18931600 | -2.74463900 | -2.45163200 |
| H | -1.14622200 | -3.88244300 | -1.49315900 |
| H | 0.60689800  | -4.08698100 | -1.60764700 |
| H | -0.60690000 | -4.08694600 | 1.60770100  |
| H | 0.18930900  | -2.74458200 | 2.45165400  |
| H | 1.14622000  | -3.88240900 | 1.49321100  |

Geometry Data for **TPDC** ( $S_0$  optimization: unit Å)

|   |            |             |            |
|---|------------|-------------|------------|
| C | 5.64169400 | -0.15306100 | 0.85960800 |
|---|------------|-------------|------------|

|   |             |             |             |
|---|-------------|-------------|-------------|
| C | 4.70824900  | -0.98307600 | 1.50178000  |
| C | 3.35856300  | -0.88500500 | 1.19666700  |
| C | 2.88599500  | 0.04306300  | 0.24714400  |
| C | 3.83258400  | 0.87830700  | -0.36611900 |
| C | 5.19552200  | 0.78348600  | -0.08189900 |
| C | 1.43278600  | 0.18136700  | -0.05448800 |
| C | 0.92496000  | 1.58282100  | -0.09836700 |
| C | 0.62341300  | -0.89818200 | -0.28944400 |
| C | -0.86365100 | -0.80006200 | -0.30660700 |
| C | 1.16071600  | -2.26763900 | -0.56001900 |
| C | 0.15624800  | 2.05004700  | -1.17443500 |
| C | -0.29923200 | 3.36794200  | -1.23759800 |
| C | 0.01206300  | 4.25737800  | -0.20129900 |
| C | 0.79136400  | 3.81264900  | 0.87974100  |
| C | 1.24769100  | 2.50329900  | 0.91935000  |
| C | 0.67005300  | -3.38364600 | 0.14098400  |
| C | 1.14958700  | -4.66572100 | -0.12679700 |
| C | 2.11633800  | -4.86186200 | -1.11610300 |
| C | 2.59847500  | -3.76500400 | -1.83457100 |
| C | 2.12581300  | -2.48200300 | -1.55935800 |
| C | -1.61492300 | -1.42109800 | -1.32275200 |
| C | -3.00133900 | -1.35297300 | -1.33929600 |
| C | -3.70738200 | -0.70744100 | -0.30330600 |
| C | -2.95772300 | -0.09769200 | 0.72329300  |
| C | -1.57022900 | -0.13973600 | 0.71598400  |
| O | 6.94292600  | -0.32727100 | 1.22480600  |
| C | 7.93265200  | 0.50073800  | 0.61610400  |
| O | -0.37995700 | 5.56149100  | -0.15323000 |
| C | -1.16943100 | 6.07088700  | -1.22692200 |
| C | -5.17570300 | -0.64388800 | -0.33825100 |
| C | -5.95100300 | -0.71414200 | 0.79790600  |
| C | -5.83557500 | -0.50938500 | -1.68314600 |
| C | -5.44839200 | -0.99881400 | 2.10899200  |
| N | -5.10600600 | -1.25137500 | 3.19283900  |
| C | -7.37634800 | -0.57387500 | 0.74935300  |
| N | -8.53544700 | -0.46196300 | 0.74063600  |
| H | 5.06354100  | -1.69142800 | 2.24340800  |
| H | 2.65207600  | -1.52897600 | 1.70936800  |
| H | 3.50124200  | 1.61493000  | -1.09154900 |
| H | 5.89082000  | 1.43988900  | -0.59086400 |
| H | -0.08469700 | 1.37352900  | -1.98796400 |
| H | -0.88132600 | 3.68799700  | -2.09314300 |
| H | 1.02939800  | 4.51308300  | 1.67386900  |
| H | 1.85583200  | 2.17879200  | 1.75804900  |
| H | -0.08543000 | -3.24134000 | 0.90818800  |
| H | 0.76636800  | -5.51196500 | 0.43602800  |
| H | 2.48567800  | -5.86053800 | -1.32939200 |
| H | 3.34008100  | -3.90857300 | -2.61514600 |
| H | 2.50124300  | -1.63449100 | -2.12378300 |
| H | -1.10025500 | -1.95104400 | -2.11740600 |
| H | -3.53943800 | -1.83243900 | -2.14928000 |
| H | -3.46049800 | 0.44410400  | 1.51566500  |
| H | -1.02012100 | 0.34740700  | 1.51320500  |
| H | 7.75509100  | 1.56044200  | 0.83170000  |
| H | 8.88514600  | 0.19808200  | 1.05161200  |
| H | 7.96672300  | 0.35295900  | -0.46924800 |
| H | -0.63166200 | 6.01618700  | -2.18025900 |

|   |             |             |             |
|---|-------------|-------------|-------------|
| H | -1.36743800 | 7.11497100  | -0.98362900 |
| H | -2.11978900 | 5.53245200  | -1.31592200 |
| H | -6.90098300 | -0.29441400 | -1.60329800 |
| H | -5.35145700 | 0.27729600  | -2.26760100 |
| H | -5.72673800 | -1.44336500 | -2.24630700 |

Geometry Data for **TPPDC** ( $S_0$  optimization: unit Å)

|   |             |             |             |
|---|-------------|-------------|-------------|
| C | -6.41482536 | 0.01044020  | 0.71196803  |
| C | -5.52467721 | -0.88831170 | 1.31212790  |
| C | -4.15955559 | -0.79119053 | 1.04316515  |
| C | -3.64271046 | 0.18987345  | 0.18528769  |
| C | -4.55612841 | 1.09805950  | -0.38755259 |
| C | -5.91764222 | 1.00689476  | -0.14175208 |
| C | -2.18020712 | 0.31275032  | -0.07323273 |
| C | -1.63817295 | 1.69972560  | -0.00051509 |
| C | -1.39074605 | -0.76699125 | -0.37098585 |
| C | 0.09847645  | -0.69509109 | -0.35106605 |
| C | -1.94783461 | -2.10034668 | -0.75495923 |
| C | -1.98526498 | 2.55833620  | 1.06251806  |
| C | -1.49344703 | 3.85247539  | 1.13586439  |
| C | -0.65087583 | 4.34567854  | 0.12700689  |
| C | -0.31487892 | 3.52111512  | -0.95328301 |
| C | -0.80774591 | 2.21720658  | -1.00487112 |
| C | -2.92115550 | -2.21918709 | -1.76175637 |
| C | -3.40801562 | -3.46808134 | -2.14280974 |
| C | -2.93283367 | -4.62740677 | -1.52664725 |
| C | -1.95905280 | -4.52691189 | -0.53144150 |
| C | -1.46574295 | -3.27800330 | -0.15704137 |
| C | 0.79251781  | -0.13951879 | 0.74055065  |
| C | 2.17929276  | -0.10948855 | 0.77050017  |
| C | 2.93786744  | -0.60507831 | -0.30922230 |
| C | 2.24814198  | -1.18173526 | -1.39215529 |
| C | 0.86055820  | -1.24296918 | -1.39956765 |
| O | -7.76572418 | 0.00745646  | 0.89704094  |
| C | -8.32582707 | -0.98034935 | 1.74897276  |
| O | -0.22499496 | 5.63035406  | 0.28636972  |
| C | 0.62708591  | 6.18517895  | -0.70573056 |
| C | 4.41087379  | -0.52369587 | -0.27228696 |
| C | 5.14167631  | -0.17818339 | -1.39030453 |
| C | 5.08461773  | -0.82086332 | 1.01476074  |
| C | 4.66779984  | -1.92591151 | 1.78043347  |
| C | 5.29520987  | -2.22940768 | 2.98537440  |
| C | 6.33046842  | -1.42087083 | 3.45975002  |
| C | 6.73804572  | -0.30949991 | 2.72036448  |
| C | 6.12541663  | -0.01286880 | 1.50523061  |
| C | 6.57292934  | -0.25116119 | -1.44655956 |
| N | 7.73134025  | -0.30442233 | -1.54989337 |
| C | 4.54306979  | 0.29883020  | -2.60320576 |
| N | 4.10914547  | 0.71191883  | -3.60147528 |
| H | -5.87770654 | -1.65761077 | 1.98837127  |
| H | -3.48086923 | -1.49294752 | 1.51620922  |
| H | -4.18641559 | 1.88096708  | -1.04228395 |
| H | -6.61971882 | 1.69873373  | -0.59524508 |
| H | -2.64418085 | 2.19523828  | 1.84524862  |
| H | -1.74969519 | 4.50707210  | 1.96237609  |

|   |             |             |             |
|---|-------------|-------------|-------------|
| H | 0.31829751  | 3.87922935  | -1.75603675 |
| H | -0.54348614 | 1.59133996  | -1.85075174 |
| H | -3.29340554 | -1.32230694 | -2.24579848 |
| H | -4.15614784 | -3.53581738 | -2.92745206 |
| H | -3.31268658 | -5.60036316 | -1.82424629 |
| H | -1.57976066 | -5.42263469 | -0.04770134 |
| H | -0.70169605 | -3.20892303 | 0.61193798  |
| H | 0.23014963  | 0.27038543  | 1.57214858  |
| H | 2.68725371  | 0.32016019  | 1.62745722  |
| H | 2.80214605  | -1.60741861 | -2.22122221 |
| H | 0.35313829  | -1.71451222 | -2.23473965 |
| H | -7.94516554 | -0.89354026 | 2.77454248  |
| H | -8.12817371 | -1.99399761 | 1.37802547  |
| H | -9.40190494 | -0.80171156 | 1.74973081  |
| H | 0.84449628  | 7.20304017  | -0.37951176 |
| H | 0.13739050  | 6.21745310  | -1.68700959 |
| H | 1.56630916  | 5.62478680  | -0.79204240 |
| H | 3.86171581  | -2.55326537 | 1.41482791  |
| H | 4.97429058  | -3.09569644 | 3.55575349  |
| H | 6.81369626  | -1.65338081 | 4.40397394  |
| H | 7.53339997  | 0.33030067  | 3.08966151  |
| H | 6.44083617  | 0.85981210  | 0.94449924  |

Geometry Data for **PPDC** ( $S_0$  optimization: unit Å)

|   |             |             |             |
|---|-------------|-------------|-------------|
| C | 7.23864300  | -0.43716200 | -0.61107000 |
| C | 6.28188200  | -1.14129500 | -1.35157000 |
| C | 4.92501800  | -0.94469000 | -1.09168000 |
| C | 4.48196300  | -0.05352800 | -0.10428000 |
| C | 5.46391100  | 0.66175100  | 0.61084600  |
| C | 6.81685700  | 0.46876700  | 0.37414500  |
| C | 3.03008700  | 0.17774200  | 0.14844200  |
| C | 2.62889500  | 1.61144700  | 0.24821800  |
| C | 2.13378200  | -0.84878100 | 0.28384000  |
| C | 0.65641500  | -0.63962800 | 0.24908600  |
| C | 2.55624800  | -2.27003600 | 0.48069100  |
| C | 3.09599300  | 2.55665200  | -0.67707500 |
| C | 2.74919300  | 3.90600700  | -0.59245700 |
| C | 1.93136900  | 4.34546700  | 0.45538400  |
| C | 1.47329000  | 3.42045100  | 1.40593300  |
| C | 1.81679100  | 2.08100800  | 1.29960700  |
| C | 3.49216100  | -2.62219800 | 1.46829800  |
| C | 3.85292100  | -3.95320500 | 1.67182900  |
| C | 3.28599300  | -4.96375300 | 0.89238600  |
| C | 2.34716700  | -4.63140700 | -0.08629600 |
| C | 1.97961900  | -3.30092100 | -0.28241600 |
| C | 0.04364300  | 0.13644000  | -0.75083500 |
| C | -1.33679100 | 0.29149200  | -0.79942000 |
| C | -2.17303400 | -0.32679100 | 0.14704800  |
| C | -1.56348800 | -1.11335800 | 1.14026500  |
| C | -0.18294200 | -1.27250600 | 1.18401200  |
| O | 8.58834300  | -0.55160400 | -0.77366600 |
| C | 9.07219200  | -1.45918400 | -1.75107700 |
| O | 1.53473300  | 5.63718900  | 0.64486400  |
| C | 1.98473600  | 6.62040600  | -0.27371300 |
| C | -3.64268000 | -0.16303700 | 0.09189300  |
| C | -4.22616600 | 1.04762400  | -0.32490600 |

|   |              |             |             |
|---|--------------|-------------|-------------|
| C | -5.60452700  | 1.20517200  | -0.37018800 |
| C | -6.47254500  | 0.14843200  | -0.02722400 |
| C | -5.88908000  | -1.06002000 | 0.40106500  |
| C | -4.50946700  | -1.20711800 | 0.46092100  |
| C | -7.93139300  | 0.34627600  | -0.07688100 |
| C | -8.81599700  | -0.64741300 | -0.42082300 |
| C | -8.45565400  | 1.72226400  | 0.25250000  |
| C | -10.23389200 | -0.42607000 | -0.40329900 |
| N | -11.38550700 | -0.25699600 | -0.39110800 |
| C | -8.43803100  | -1.95389400 | -0.87606100 |
| N | -8.18575200  | -3.02258700 | -1.26164300 |
| H | 6.57664700   | -1.83616500 | -2.12977400 |
| H | 4.19473100   | -1.49733600 | -1.67426100 |
| H | 5.15494800   | 1.37406000  | 1.37052000  |
| H | 7.57031500   | 1.01094600  | 0.93720200  |
| H | 3.74103900   | 2.23101600  | -1.48814600 |
| H | 3.12386000   | 4.59800200  | -1.33808100 |
| H | 0.85551300   | 3.77956600  | 2.22327500  |
| H | 1.45829700   | 1.38009700  | 2.04684300  |
| H | 3.93625200   | -1.84199600 | 2.07869700  |
| H | 4.57519400   | -4.20153500 | 2.44526300  |
| H | 3.56778300   | -6.00128400 | 1.05115500  |
| H | 1.89612200   | -5.40979600 | -0.69644100 |
| H | 1.24032200   | -3.05234000 | -1.03892600 |
| H | 0.66154500   | 0.61293200  | -1.50494900 |
| H | -1.77611600  | 0.87021300  | -1.60722200 |
| H | -2.17558300  | -1.58572300 | 1.90357400  |
| H | 0.25848800   | -1.88833200 | 1.96214600  |
| H | 10.16097600  | -1.39832400 | -1.70320600 |
| H | 8.75621200   | -2.48871100 | -1.53714900 |
| H | 8.73797100   | -1.18270600 | -2.75989600 |
| H | 1.55854600   | 7.56574700  | 0.06710700  |
| H | 3.08003600   | 6.69743900  | -0.27861900 |
| H | 1.63431000   | 6.41188700  | -1.29331300 |
| H | -3.58826500  | 1.88579800  | -0.58854400 |
| H | -6.01036900  | 2.15875300  | -0.69202200 |
| H | -6.51644900  | -1.88810000 | 0.70894700  |
| H | -4.09608100  | -2.15900400 | 0.77949400  |
| H | -8.24174100  | 2.41760200  | -0.56959900 |
| H | -9.53566200  | 1.72398800  | 0.40832900  |
| H | -7.96312200  | 2.11728700  | 1.14644200  |
